# Supplementary material for: Radiation- and Photo-Induced Oxidation Pathways of Methionine in Model Peptide Backbone under Anoxic Conditions
Source: MDPI journal article supplement (doi:10.3390/ijms22094773), 2021-04-30
Supplement: s1 [file s1]

## *Supporting Information*

### **Radiation- and Photo-induced Oxidation Pathways of Methionine in Model Peptide Backbone Under Anoxic Conditions**

Tomasz Pedzinski, Katarzyna Grzyb, Konrad Skotnicki, Piotr Filipiak, Krzysztof Bobrowski\*, Chrysostomos Chatgililoglu,\* Bronisław Marciniak,\*

\*Corresponding Authors: chrys@isof.cnr.it (C.C.), marcinia@amu.edu.pl (B.M.), kris@ichtj.pl (K.B.)

#### **Contents:**

|                       |         |
|-----------------------|---------|
| Figures S1, S2 and S3 | Page S2 |
| Figures S4 and S5     | S3      |
| Figure S6             | S4      |
| Figure S7             | S5      |
| Figure S8             | S6      |
| Figure S9             | S7      |
| Figure S10            | S8      |
| Figure S11            | S9      |
| Figure S12            | S10     |
| Figure S13            | S11     |

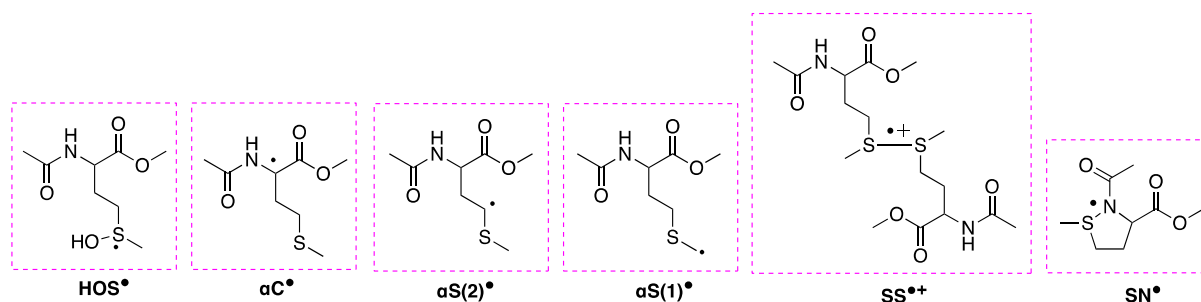

**Figure S1.** The structures of six reactive intermediates identified in the pulse radiolysis experiments.

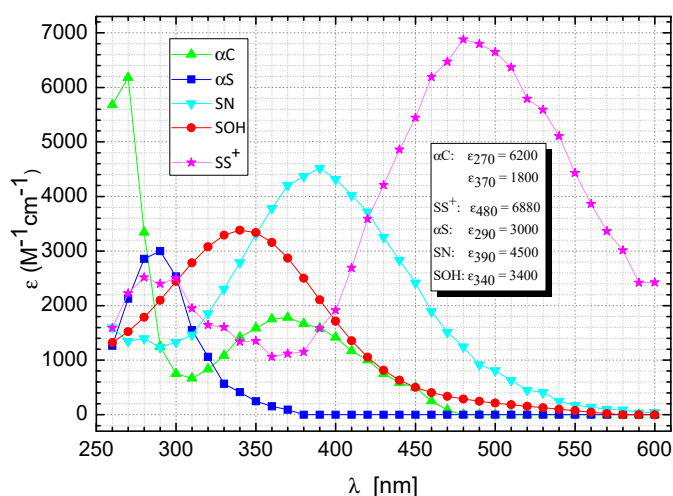

**Figure S2.** Reference spectra used in the resolutions of the transient absorption spectra following  $^\bullet\text{OH}$ -induced oxidation of  $\text{CH}_3\text{C}(\text{O})\text{N-Met-OCH}_3$ .

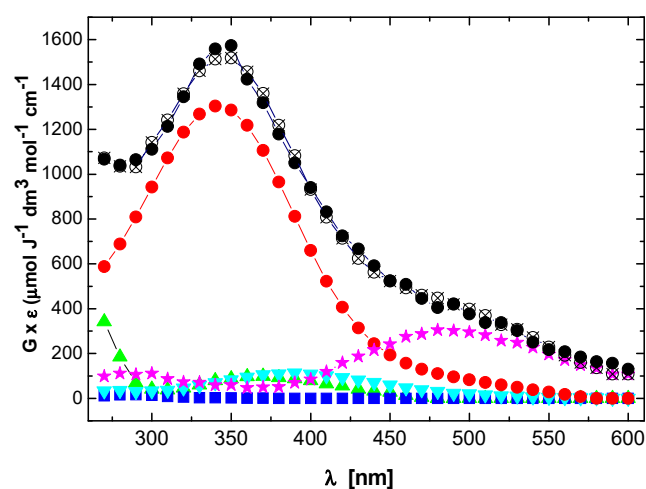

**Figure S3.** Resolution of the spectral components:  $\text{HOS}^\bullet$  (●),  $\alpha\text{C}^\bullet$  (▲),  $\alpha\text{S}(1)^\bullet$  and  $\alpha\text{S}(2)^\bullet$  (■),  $\text{SS}^{\bullet+}$  (★),  $\text{SN}^\bullet$  (▼) in the transient absorption spectrum recorded 1.1  $\mu\text{s}$  (●— experimental; ⊗— fit) after the electron pulse in  $\text{N}_2\text{O}$ -saturated aqueous solution containing 0.2 mM AcN-Met-OMe at pH 7.0.

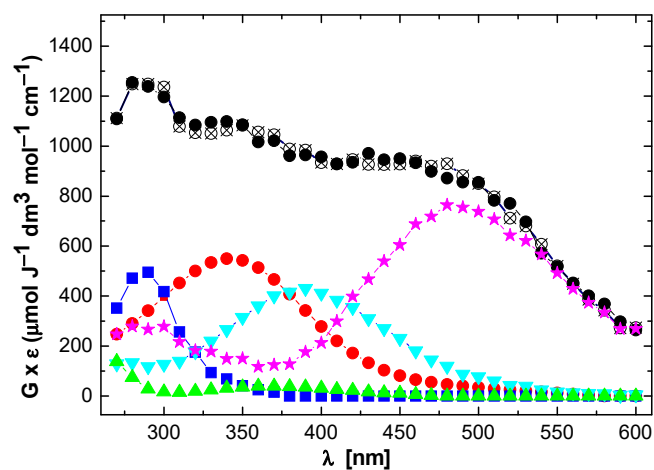

**Figure S4.** Resolution of the spectral components:  $\text{HOS}^\bullet$  (●),  $\alpha\text{C}^\bullet$  (▲),  $\alpha\text{S}(1)^\bullet$  and  $\alpha\text{S}(2)^\bullet$  (■),  $\text{SS}^{\bullet+}$  (★),  $\text{SN}^\bullet$  (▼) in the transient absorption spectrum recorded 3  $\mu\text{s}$  (●— experimental; ⊗— fit) after the electron pulse in  $\text{N}_2\text{O}$ -saturated aqueous solution containing 0.2 mM AcN-Met-OMe at pH 7.0

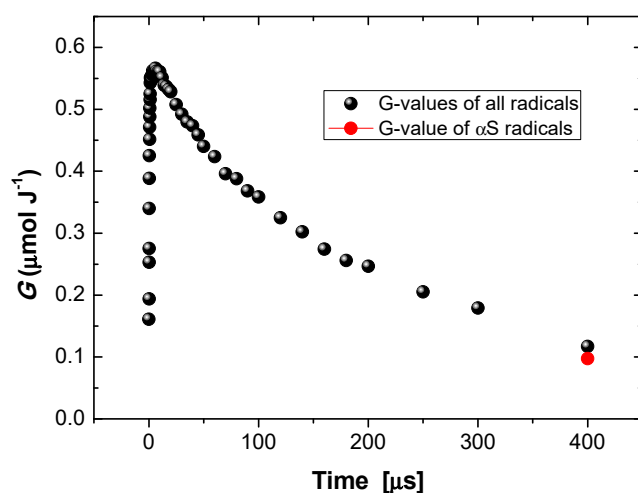

**Figure S5.** The sum of all radicals ( $\text{HOS}^\bullet$ ,  $\alpha\text{C}^\bullet$ ,  $\text{SS}^{\bullet+}$ ,  $\text{SN}^\bullet$ ,  $\alpha\text{S}^\bullet$ ) taken in spectral resolution as a function of time.

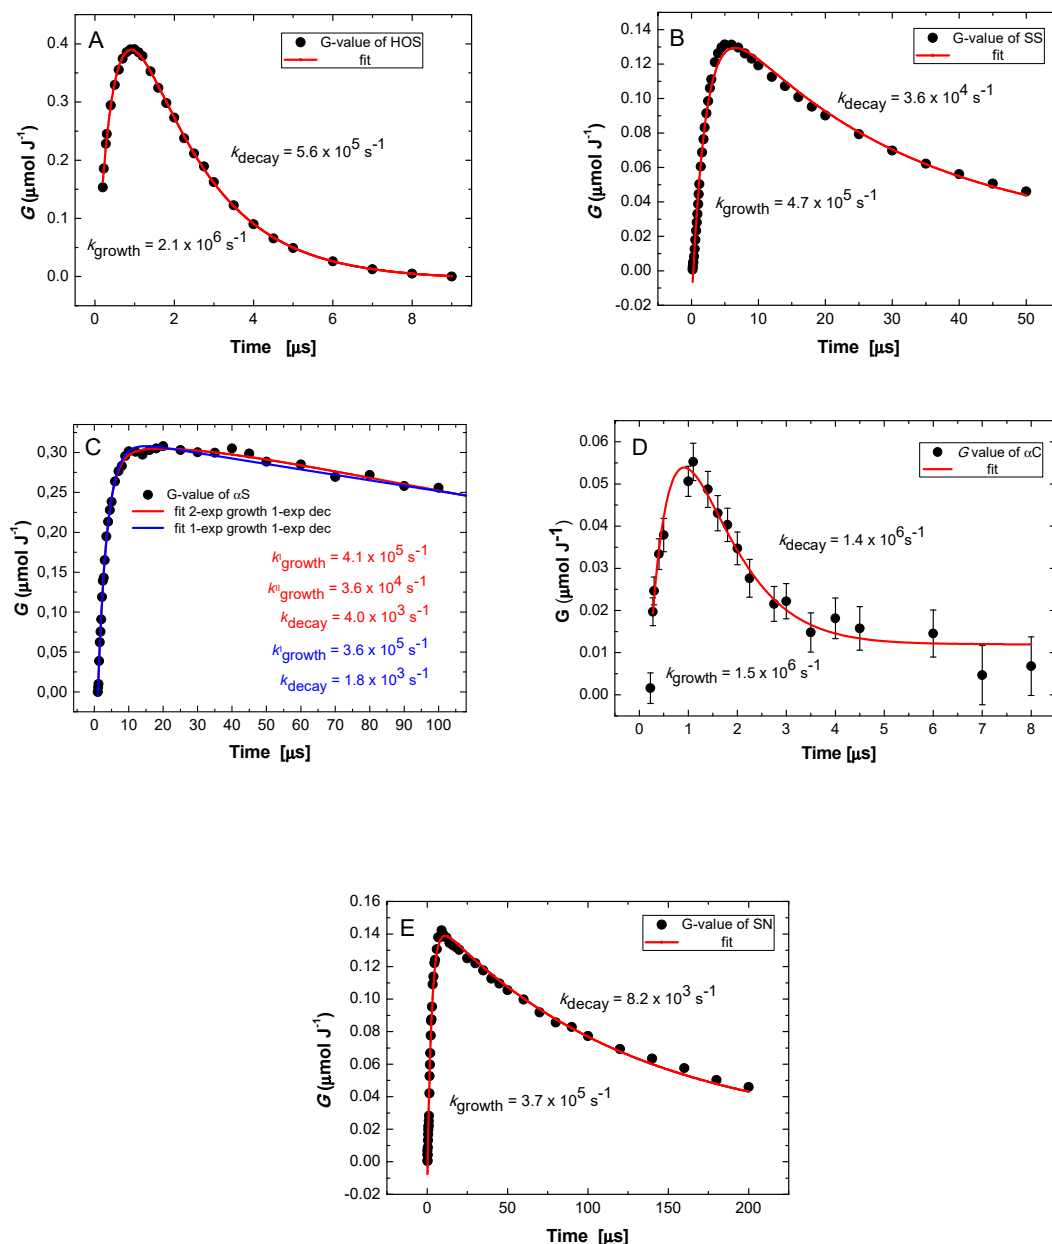

**Figure S6.** First-order kinetic fits of the growth and decay of radicals HOS• (panel A), SS•<sup>+</sup> (panel B), αS• (panel C), αC• (panel D), and SN• (panel E).

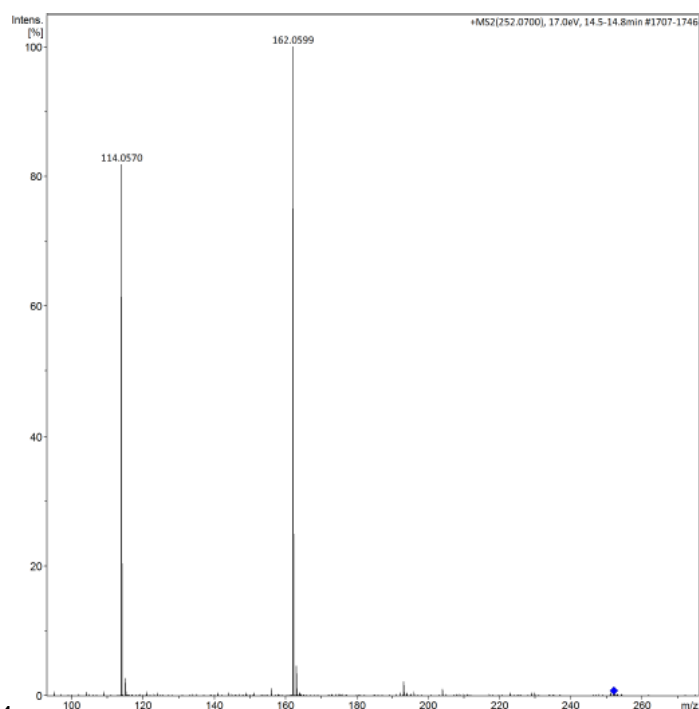

Compound 4

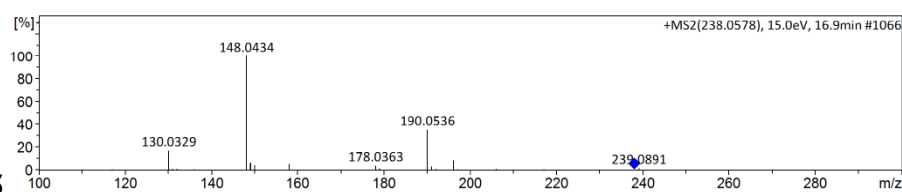

Compound 5

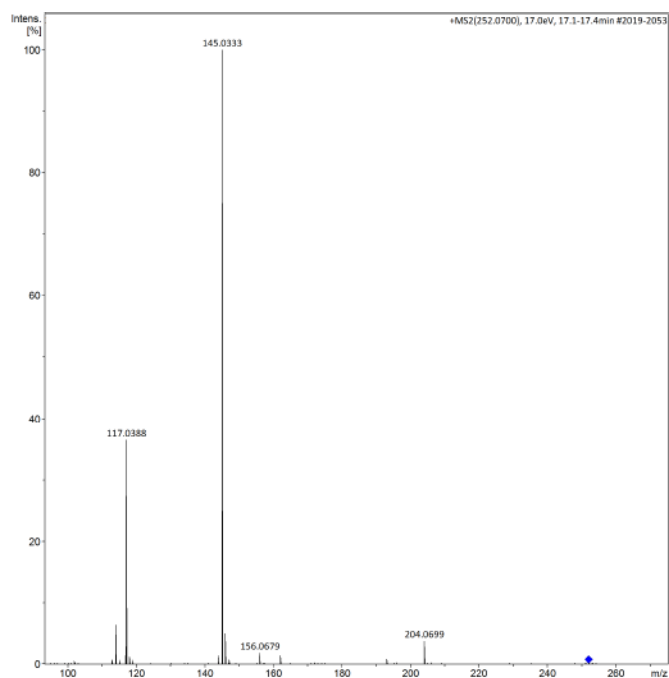

Compound 6

**Figure S7.** High-resolution MS/MS spectra of the products **4** ( $m/z$  252.0731) and **6** ( $m/z$  252.0732) derived from the cross-termination of  $\alpha\text{S}$  (**1**) $\cdot$  and  $\alpha\text{S}$ (**2**) $\cdot$  with  $\text{CH}_3\text{S}\cdot$  and product **5** ( $m/z$  238.0578) – a disulfide.

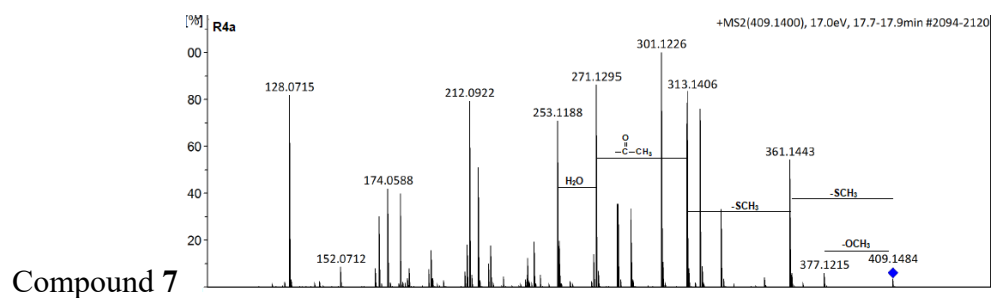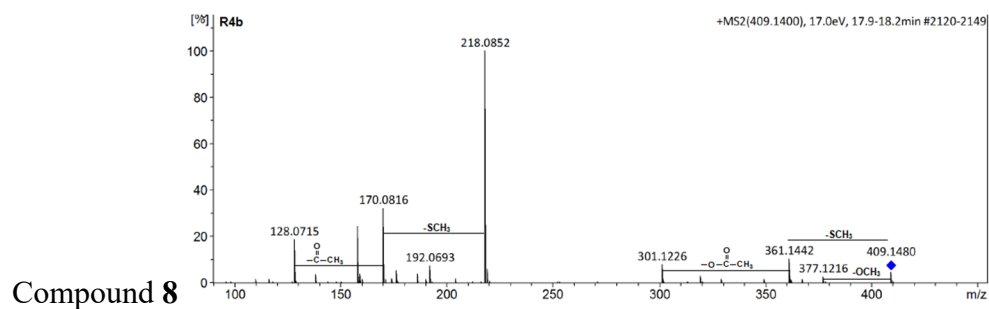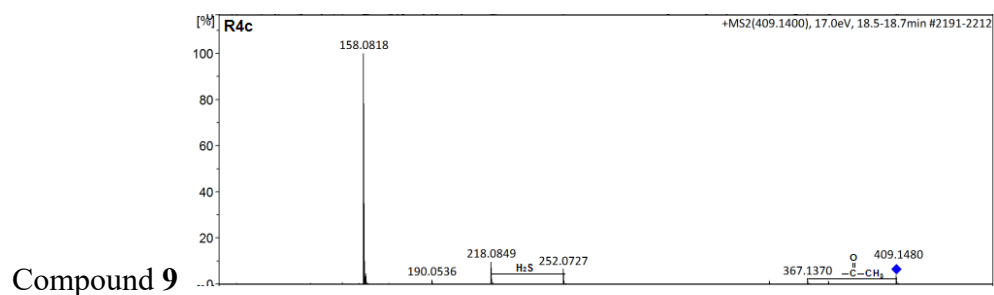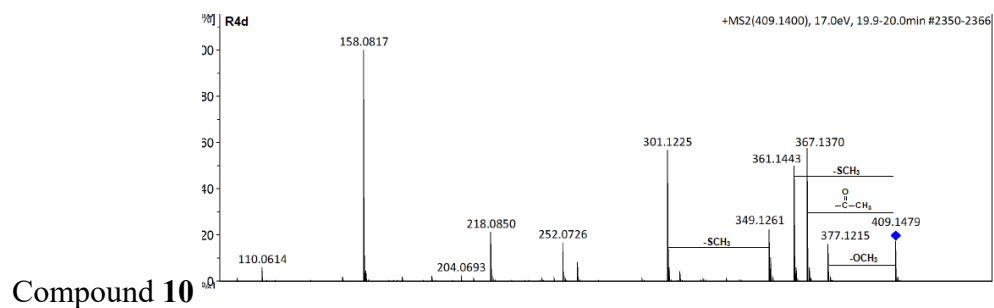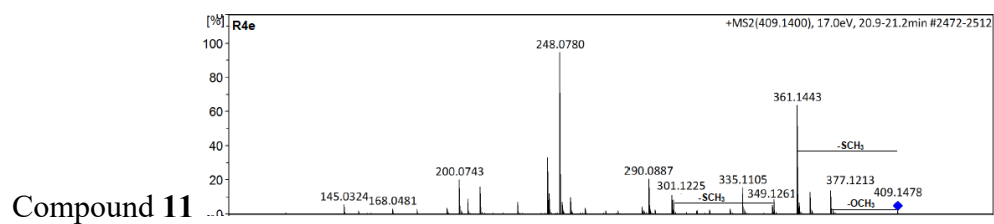

**Figure S8.** High-resolution MS/MS spectra of the five dimeric products **7** ( $m/z$  409.1484), **8** ( $m/z$  409.1480), **9** ( $m/z$  409.1480), **10** ( $m/z$  409.1479) and **11** ( $m/z$  409.1478) derived from the combination of two  $\alpha S^\bullet$  radicals.

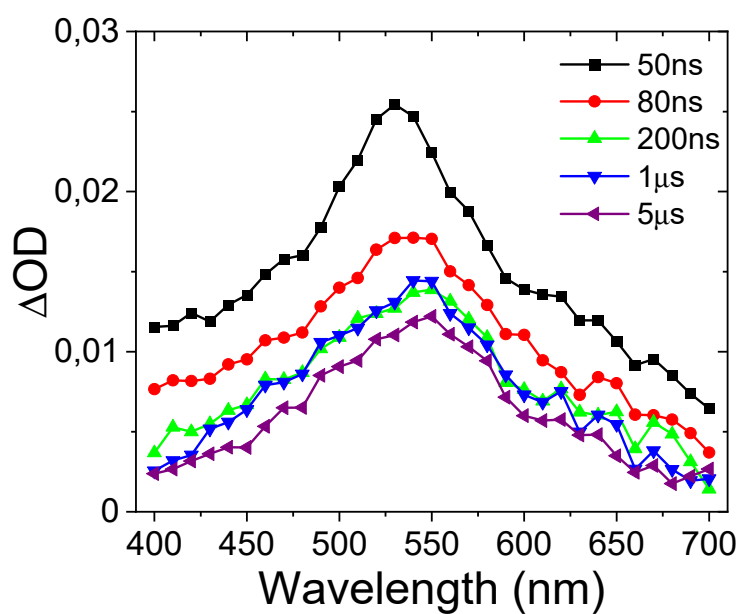

**Figure S9.** Transient absorption spectra following LFP of CB (4mM) and *N*-AcMetOCH<sub>3</sub> (20mM) for different delay times at pH 7. The initially formed CB excited triplet with a transient absorption maximum at 520 nm (50 ns delay time) yields ketyl radical CBH<sup>•</sup> with a maximum at 550 nm (observed at 1-5 μs timescale).

### Photolysis 8

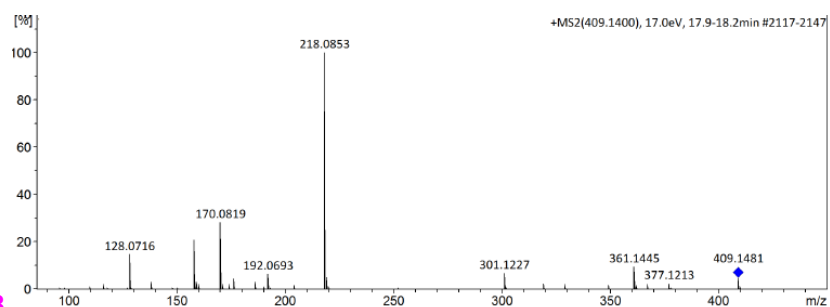

### Photolysis 9

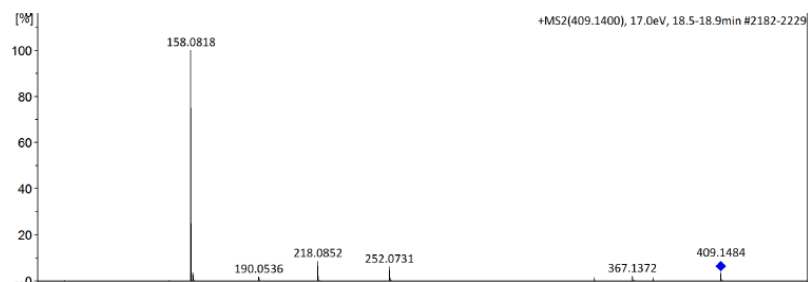

### Photolysis 10

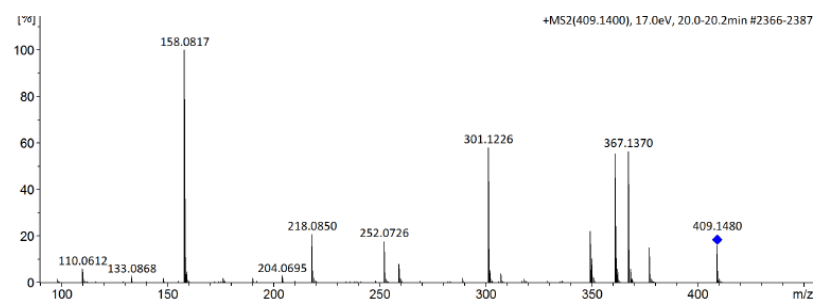

**Figure S10.** High-resolution MS/MS spectra of the dimeric products **8** ( $m/z$  409.1481), **9** ( $m/z$  409.1484) and **10** ( $m/z$  409.1480) derived from the combination of two  $\alpha\text{S}(2)^\bullet$  radicals.



Photolysis 18

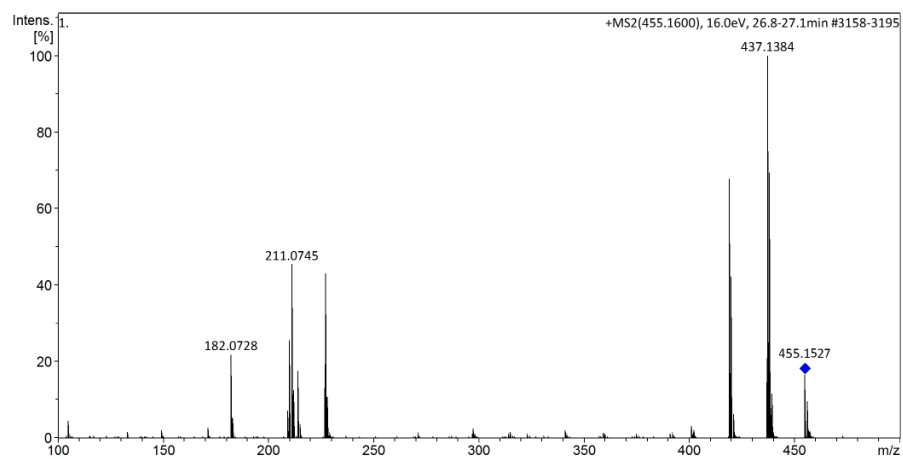

Photolysis 19

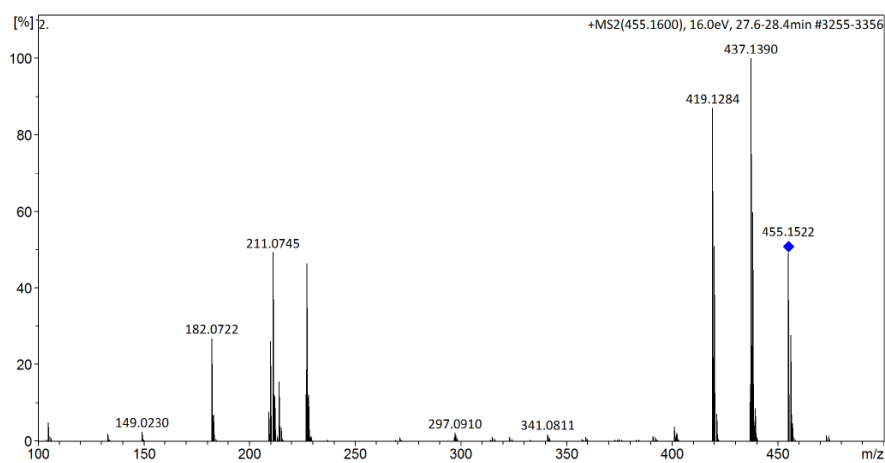

**Figure S11.** High-resolution MS/MS spectra of the two dimeric products **18** ( $m/z$  455.1527) and **19** ( $m/z$  455.1522) derived from of the combination of two **CBH<sup>•</sup>** radicals.

Photolysis 12

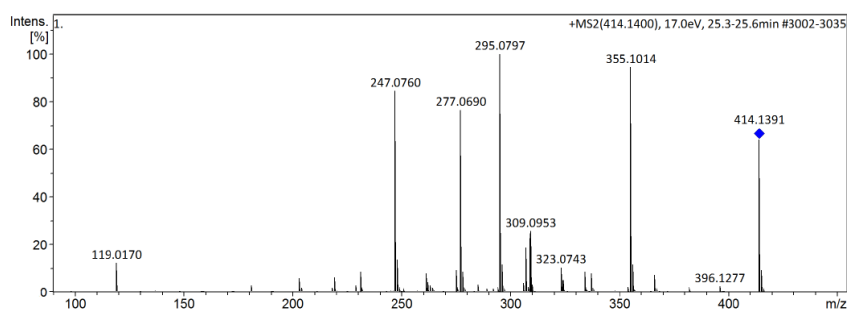

Photolysis 13

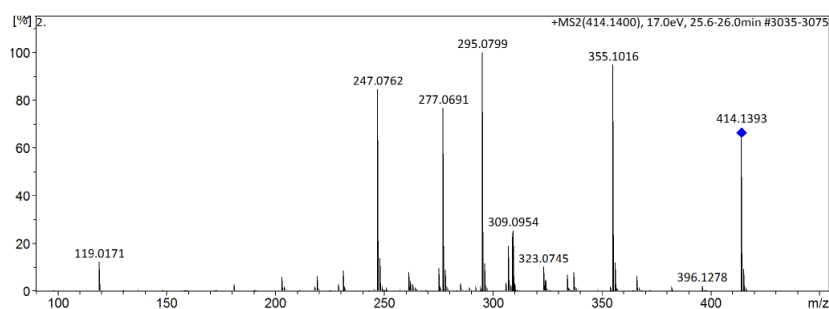

Photolysis 16

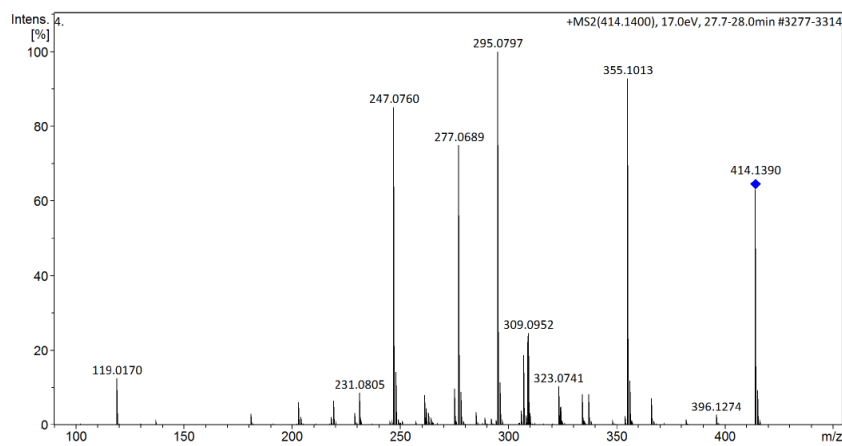

Photolysis 17

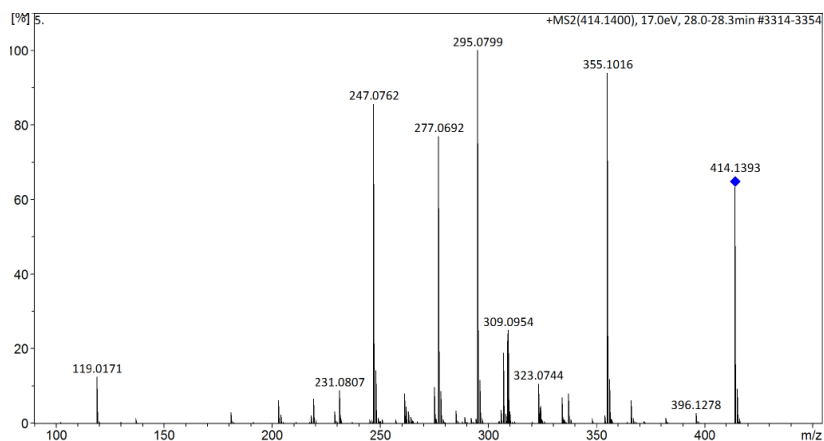

**Figure S12.** High-resolution MS/MS spectra of the products **12** ( $m/z$  414.1391, **13** ( $m/z$  414.1393), **16** ( $m/z$  414.1390) and **17** ( $m/z$  414.1393) derived from the cross-termination of  $\alpha S^\bullet$  and  $CBH^\bullet$  radicals.

Photolysis 14

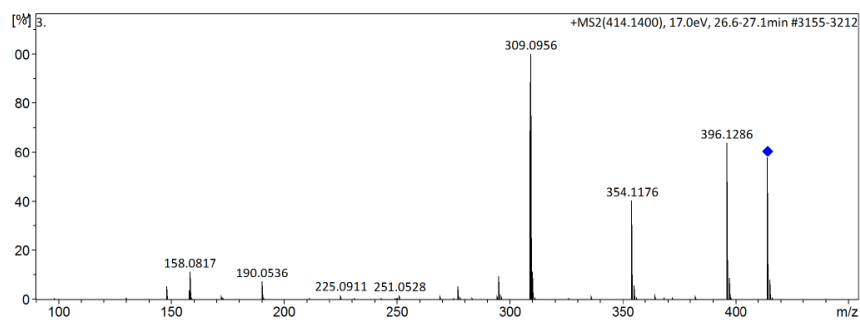

**Figure S13.** High-resolution MS/MS spectra of the product **14** ( $m/z$  414.1392) derived from the cross-termination of  $\alpha S^\bullet$  and  $CBH^\bullet$  radicals.
